# Supplementary material for: Loss of MIG6 Accelerates Initiation and Progression of Mutant Epidermal Growth Factor Receptor–Driven Lung Adenocarcinoma
Source: Oxford University Press journal article supplement (doi:10.1158/2159-8290.cd-14-0750), 2015-03-03
Supplement: 21598290cd140750-sup-134851_2_supp_2864621_nj2r5s.xlsx [file 21598290cd140750-sup-134851_2_supp_2864621_nj2r5s.xlsx]

## Sheet: Sheet1
Mouse Number	Designation	EGFR	Mig6 Genotype	Days in Doxycycline
U1779	M1	L858R Line 57	+/+	107 days
U1055	M2	L858R Line 57	+/+	49 days
U2146	M3	L858R Line 57	+/+	61 days
U466	M4	L858R Line 57	+/-	42 days
U1829	M5	L858R Line 57	+/-	38 days
U1835	M6	L858R Line 57	+/-	49 days
U1415	M7	L858R Line 57	-/-	13 days
U1993	M8	L858R Line 57	-/-	22 days
U758	M9	L858R Line 57	-/-	21 days
U2266	M10	L858R Line 57	-/-	8 days
U1199	M11	Deletion Line 9	+/+	198 days
U2221	M12	Deletion Line 9	+/+	36 days
U1647	M13	Deletion Line 9	+/+	162 days
U398	M14	Deletion Line 9	+/+	38 days
U397	M15	Deletion Line 9	+/-	24 days
U1645	M16	Deletion Line 9	+/-	42 days
U2270	M17	Deletion Line 9	+/-	25 days
U1986	M18	Deletion Line 9	-/-	16 days
U2472	M19	Deletion Line 9	-/-	15 days
U2154	M20	Deletion Line 9	-/-	16 days
U3291		L858R Line 56	+/+	9 days
U3289		L858R Line 56	+/+	9 days
U3288		L858R Line 56	+/-	9 days
U3192		L858R Line 56	+/-	9 days
U3195		L858R Line 56	+/-	9 days
U3194		L858R Line 56	-/-	9 days
U3290		L858R Line 56	-/-	9 days
U4064		L858R Line 56	+/+	7 days
U4065		L858R Line 56	+/+	7 days
U4066		L858R Line 56	+/+	7 days
U3715		L858R Line 56	+/+	7 days
U3117		L858R Line 56	+/+	7 days
U3115		L858R Line 56	+/+	7 days
U3956		L858R Line 56	+/-	7 days
U3926		L858R Line 56	+/-	7 days
U3929		L858R Line 56	+/-	7 days
U3897		L858R Line 56	+/-	7 days
U4018		L858R Line 56	+/-	7 days
U4056		L858R Line 56	+/-	7 days
U4058		L858R Line 56	+/-	7 days
U4092		L858R Line 56	+/-	7 days
U4062		L858R Line 56	-/-	7 days
U4026		L858R Line 57	+/+	7 days
U4028		L858R Line 57	+/+	7 days
U4031		L858R Line 57	+/+	7 days
U3125		L858R Line 57	+/+	7 days
U3129		L858R Line 57	+/+	7 days
U3990		L858R Line 57	+/+	7 days
U3705		L858R Line 57	+/+	7 days
U4024		L858R Line 57	+/-	7 days
U4025		L858R Line 57	+/-	7 days
U4103		L858R Line 57	+/-	7 days
U3877		L858R Line 57	+/-	7 days
U3918		L858R Line 57	+/-	7 days
U3886		L858R Line 57	+/-	7 days
U3724		L858R Line 57	+/-	7 days
U3834		L858R Line 57	+/-	7 days
U3908		L858R Line 57	+/-	7 days
U4008		L858R Line 57	-/-	7 days
U4101		L858R Line 57	-/-	7 days
